# Supplementary material for: Identifying elemental genomic track types and representing them uniformly
Source: Springer Nature journal article supplement (doi:10.1186/1471-2105-12-494), 2011-12-01
Supplement: 12859_2011_5126_MOESM2_ESM.pdf [file 12859_2011_5126_MOESM2_ESM.pdf]

### Basic track types

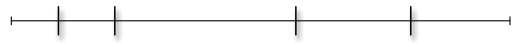

Points (P)

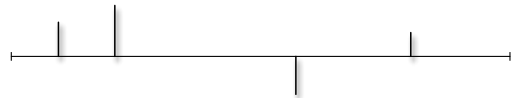

Valued Points (VP)

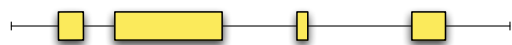

Segments (S)

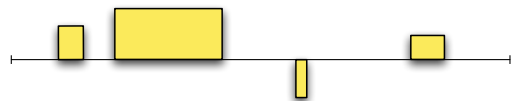

Valued Segments (VS)

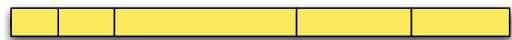

Genome Partition (GP)

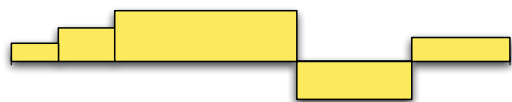

Step Function (SF)

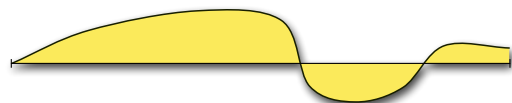

Function (F)

### Extended track types

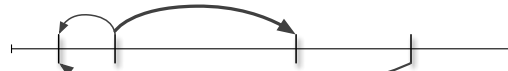

Linked Points (LP)

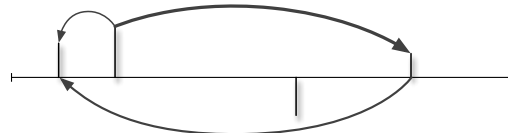

Linked Valued Points (LVP)

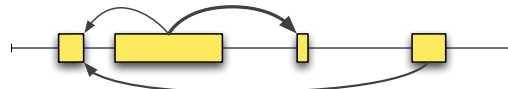

Linked Segments (LS)

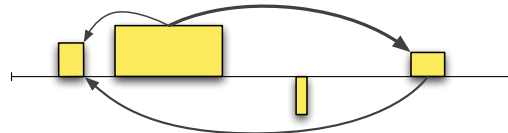

Linked Valued Segments (LVS)

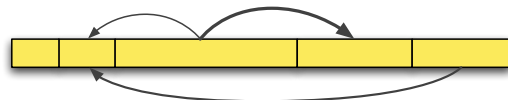

Linked Genome Partition (LGP)

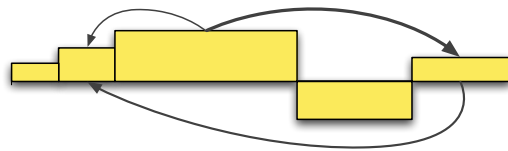

Linked Step Function (LSF)

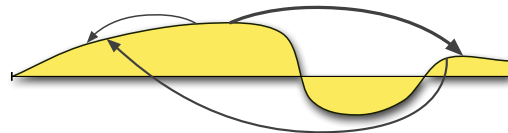

Linked Function (LF)

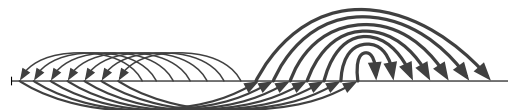

Linked Base Pairs (LBP)
