# Supplementary material for: Identifying elemental genomic track types and representing them uniformly
Source: Springer Nature journal article supplement (doi:10.1186/1471-2105-12-494), 2011-12-01

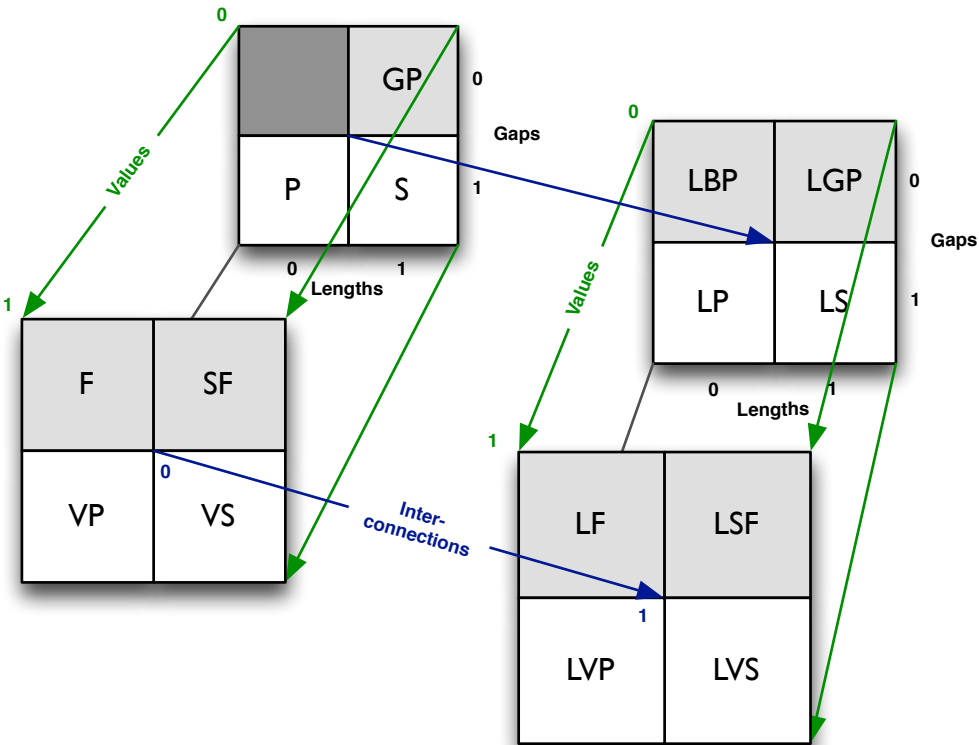

Supplement: 12859_2011_5126_MOESM3_ESM.pdf [file 12859_2011_5126_MOESM3_ESM.pdf]
