# Supplementary material for: Identifying elemental genomic track types and representing them uniformly
Source: Springer Nature journal article supplement (doi:10.1186/1471-2105-12-494), 2011-12-01
Supplement: 12859_2011_5126_MOESM6_ESM.pdf [file 12859_2011_5126_MOESM6_ESM.pdf]

A

```
##gtrack version: 1.0
##gtrack subtype: GFF ad hoc
##subtype version: 1.0
##subtype adherence: redefinable
##track type: linked valued segments
##value type: category
##1-indexed: true
##end inclusive: true
###source  value  start  end  score  strand  phase  id  name  edges
```

B

```
##subtype URL: http://gtrack.no/gff_ad_hoc.gtrack
####seqid=ctg123; start=1; end=1497228
```

```
.          gene  1000  9000  .      +      .      gene00001  EDEN  .
```

```
(...)
```
